# Supplementary material
Source: ML conference proceedings conference paper supplement (https://proceedings.neurips.cc/paper_files/paper/2019/hash/1cd138d0499a68f4bb72bee04bbec2d7-Abstract.html)
Supplement: Supplementary file [file 1cd138d0499a68f4bb72bee04bbec2d7-Supplemental.zip]

408 **A Notation and definitions**

| Notation                             | Definition                                                                                                                                                                                                                                               |
|--------------------------------------|----------------------------------------------------------------------------------------------------------------------------------------------------------------------------------------------------------------------------------------------------------|
| $H(p, q)$                            | Cross-entropy between “target” distribution $p$ and “predicted” distribution $q$                                                                                                                                                                         |
| $x$                                  | A labeled example, used as input to a model                                                                                                                                                                                                              |
| $p$                                  | A (one-hot) label                                                                                                                                                                                                                                        |
| $L$                                  | The number of possible label classes (the dimensionality of $p$ )                                                                                                                                                                                        |
| $\mathcal{X}$                        | A batch of labeled examples and their labels                                                                                                                                                                                                             |
| $\mathcal{X}'$                       | A batch of processed labeled examples produced by MixMatch                                                                                                                                                                                               |
| $u$                                  | An unlabeled example, used as input to a model                                                                                                                                                                                                           |
| $q$                                  | A guessed label distribution for an unlabeled example                                                                                                                                                                                                    |
| $\mathcal{U}$                        | A batch of unlabeled examples                                                                                                                                                                                                                            |
| 409 $\mathcal{U}'$                   | A batch of processed unlabeled examples with their label guesses produced by MixMatch                                                                                                                                                                    |
| $\theta$                             | The model’s parameters                                                                                                                                                                                                                                   |
| $p_{\text{model}}(y \mid x; \theta)$ | The model’s predicted distribution over classes                                                                                                                                                                                                          |
| $\text{Augment}(x)$                  | A stochastic data augmentation function that returns a modified version of $x$ . For example, $\text{Augment}(\cdot)$ could implement randomly shifting an input image, or implement adding a perturbation sampled from a Gaussian distribution to $x$ . |
| $\lambda_{\mathcal{U}}$              | A hyper-parameter weighting the contribution of the unlabeled examples to the training loss                                                                                                                                                              |
| $\alpha$                             | Hyperparameter for the Beta distribution used in MixUp                                                                                                                                                                                                   |
| $T$                                  | Temperature parameter for sharpening used in MixMatch                                                                                                                                                                                                    |
| $K$                                  | Number of augmentations used when guessing labels in MixMatch                                                                                                                                                                                            |

## B Tabular results

### B.1 CIFAR-10

Training the same model with supervised learning on the entire 50000-example training set achieved an error rate of 4.13%.

| Methods/Labels | 250              | 500              | 1000             | 2000             | 4000             |
|----------------|------------------|------------------|------------------|------------------|------------------|
| PiModel        | $53.02 \pm 2.05$ | $41.82 \pm 1.52$ | $31.53 \pm 0.98$ | $23.07 \pm 0.66$ | $17.41 \pm 0.37$ |
| PseudoLabel    | $49.98 \pm 1.17$ | $40.55 \pm 1.70$ | $30.91 \pm 1.73$ | $21.96 \pm 0.42$ | $16.21 \pm 0.11$ |
| Mixup          | $47.43 \pm 0.92$ | $36.17 \pm 1.36$ | $25.72 \pm 0.66$ | $18.14 \pm 1.06$ | $13.15 \pm 0.20$ |
| VAT            | $36.03 \pm 2.82$ | $26.11 \pm 1.52$ | $18.68 \pm 0.40$ | $14.40 \pm 0.15$ | $11.05 \pm 0.31$ |
| MeanTeacher    | $47.32 \pm 4.71$ | $42.01 \pm 5.86$ | $17.32 \pm 4.00$ | $12.17 \pm 0.22$ | $10.36 \pm 0.25$ |
| MixMatch       | $11.08 \pm 0.87$ | $9.65 \pm 0.94$  | $7.75 \pm 0.32$  | $7.03 \pm 0.15$  | $6.24 \pm 0.06$  |

Table 5: Error rate (%) for CIFAR10.

### B.2 SVHN

Training the same model with supervised learning on the entire 73257-example training set achieved an error rate of 2.59%.

| Methods/Labels | 250              | 500              | 1000             | 2000             | 4000            |
|----------------|------------------|------------------|------------------|------------------|-----------------|
| PiModel        | $17.65 \pm 0.27$ | $11.44 \pm 0.39$ | $8.60 \pm 0.18$  | $6.94 \pm 0.27$  | $5.57 \pm 0.14$ |
| PseudoLabel    | $21.16 \pm 0.88$ | $14.35 \pm 0.37$ | $10.19 \pm 0.41$ | $7.54 \pm 0.27$  | $5.71 \pm 0.07$ |
| Mixup          | $39.97 \pm 1.89$ | $29.62 \pm 1.54$ | $16.79 \pm 0.63$ | $10.47 \pm 0.48$ | $7.96 \pm 0.14$ |
| VAT            | $8.41 \pm 1.01$  | $7.44 \pm 0.79$  | $5.98 \pm 0.21$  | $4.85 \pm 0.23$  | $4.20 \pm 0.15$ |
| MeanTeacher    | $6.45 \pm 2.43$  | $3.82 \pm 0.17$  | $3.75 \pm 0.10$  | $3.51 \pm 0.09$  | $3.39 \pm 0.11$ |
| MixMatch       | $3.78 \pm 0.26$  | $3.64 \pm 0.46$  | $3.27 \pm 0.31$  | $3.04 \pm 0.13$  | $2.89 \pm 0.06$ |

Table 6: Error rate (%) for SVHN.

### 417 B.3 SVHN+Extra

418 Training the same model with supervised learning on the entire 604388-example training set achieved  
 419 an error rate of 1.71%.

| Methods/Labels | 250              | 500              | 1000             | 2000            | 4000            |
|----------------|------------------|------------------|------------------|-----------------|-----------------|
| PiModel        | $13.71 \pm 0.32$ | $10.78 \pm 0.59$ | $8.81 \pm 0.33$  | $7.07 \pm 0.19$ | $5.70 \pm 0.13$ |
| PseudoLabel    | $17.71 \pm 0.78$ | $12.58 \pm 0.59$ | $9.28 \pm 0.38$  | $7.20 \pm 0.18$ | $5.56 \pm 0.27$ |
| Mixup          | $33.03 \pm 1.29$ | $24.52 \pm 0.59$ | $14.05 \pm 0.79$ | $9.06 \pm 0.55$ | $7.27 \pm 0.12$ |
| VAT            | $7.44 \pm 1.38$  | $7.37 \pm 0.82$  | $6.15 \pm 0.53$  | $4.99 \pm 0.30$ | $4.27 \pm 0.30$ |
| MeanTeacher    | $2.77 \pm 0.10$  | $2.75 \pm 0.07$  | $2.69 \pm 0.08$  | $2.60 \pm 0.04$ | $2.54 \pm 0.03$ |
| MixMatch       | $2.22 \pm 0.08$  | $2.17 \pm 0.07$  | $2.18 \pm 0.06$  | $2.12 \pm 0.03$ | $2.07 \pm 0.05$ |

Table 7: Error rate (%) for SVHN+Extra.

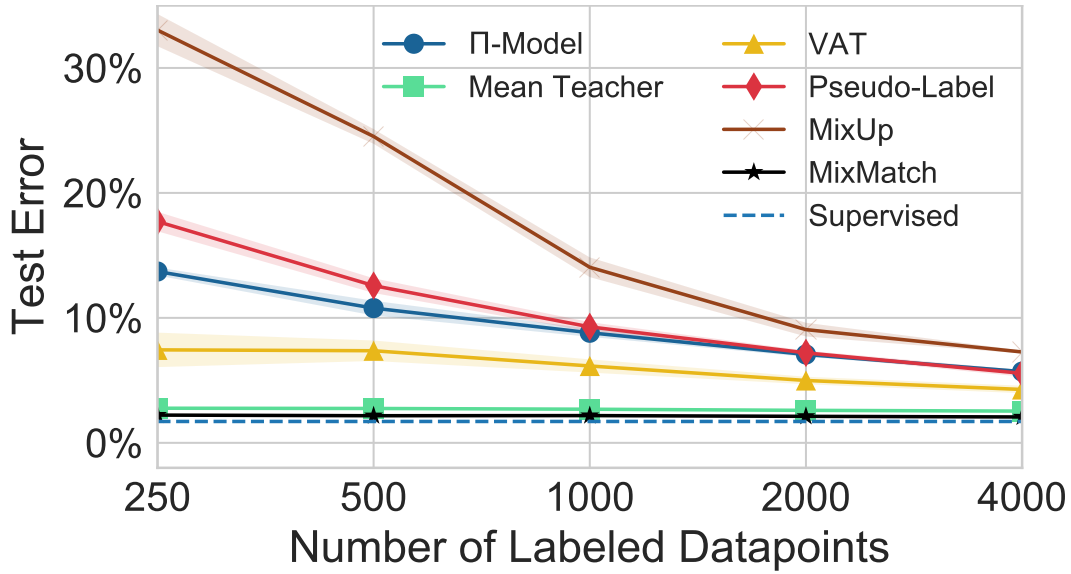

Figure 4: Error rate comparison of MixMatch to baseline methods on SVHN+Extra for a varying number of labels. With 250 examples we reach nearly the state of the art compared to supervised training for this model.
